# Supplementary material for: Distinct Expression Patterns of Cxcl12 in Mesenchymal Stem Cell Niches of Intact and Injured Rodent Teeth
Source: MDPI journal article supplement (doi:10.3390/ijms22063024), 2021-03-16
Supplement: s1 [file s1]

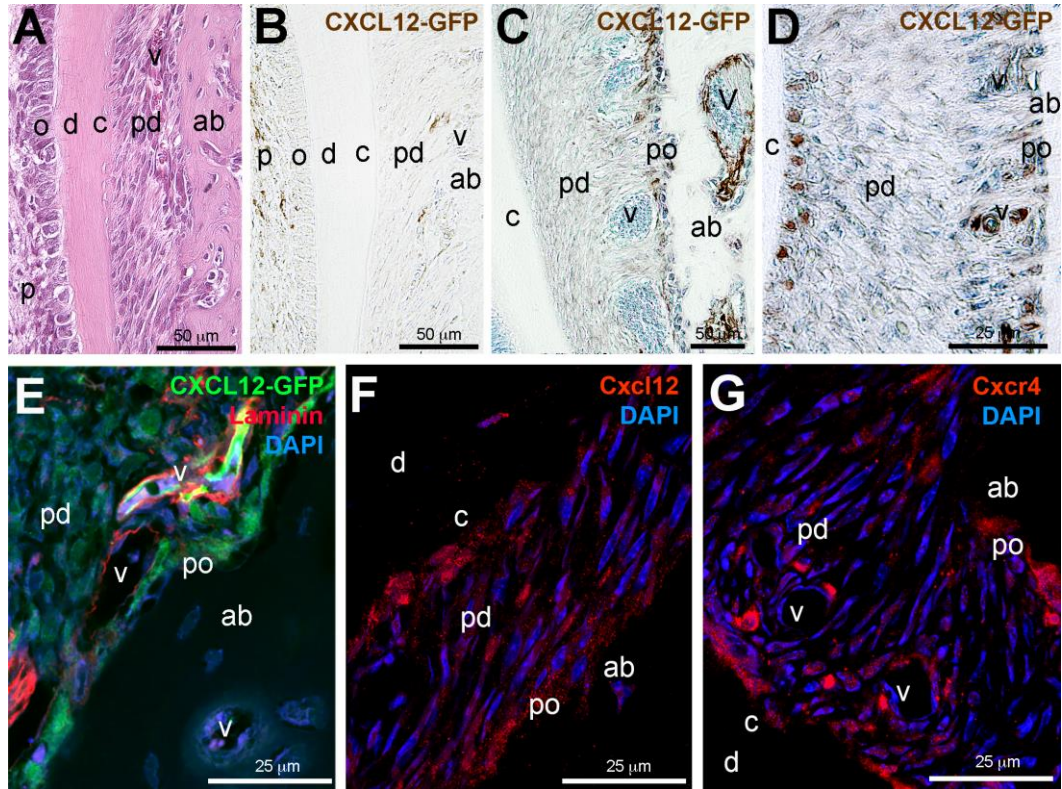

**Figure S1.** Expression of Cxcl12 and Cxcr4 in the periodontium. **A)** Histology of the mouse first molar periodontium upon staining with haematoxylin-eosin. **B)** Immunohistochemistry showing *Cxcl12*-GFP expression (brown colour) in the periodontium of mouse first molars. **C, D)** Immunohistochemistry showing *Cxcl12*-GFP expression (brown colour) in the periodontium of mouse lower incisors. **E)** Double immunofluorescent staining showing expression of *Cxcl12*-GFP (green colour) relative to Laminin (red colour) in the periodontium of mouse first molars. DAPI in blue colour. **F)** Immunofluorescent staining showing localization of the Cxcl12 protein in the molar periodontium. DAPI in blue colour. **G)** Immunofluorescent staining showing localization of the Cxcr4 protein in the molar periodontium. DAPI in blue colour. Abbreviations: ab, alveolar bone; c, cementum; d, dentin; o, odontoblasts; p, dental pulp; pd, periodontium; po, periosteum; v, vessel. Scale bars: A-C, 50 μm; D-G, 25 μm.
